# Supplementary material for: Nuclear DNA Amounts in Chinese Bryophytes Estimated by Flow Cytometry: Variation Patterns and Biological Significances
Source: MDPI journal article supplement (doi:10.3390/plants12071564), 2023-04-05
Supplement: s1 [file s1]

Table S1. Significance levels of difference among families in genome sizes (each with more than three species)

|                 | Leucobryaceae | Rhytidiaceae | Entodontaceae | Orthotrichaceae | Dicranaceae | Mniaceae |
|-----------------|---------------|--------------|---------------|-----------------|-------------|----------|
| Rhytidiaceae    | N             |              |               |                 |             |          |
| Entodontaceae   | 0.033         | 0.021        |               |                 |             |          |
| Orthotrichaceae | 0.039         | 0.025        | N             |                 |             |          |
| Dicranaceae     | N             | N            | 0.022         | 0.026           |             |          |
| Mniaceae        | N             | N            | 0.046         | N               | N           |          |
| Bartramiaceae   | N             | 0.048        | N             | N               | N           | N        |
| Grimmiaceae     | 0.037         | 0.021        | N             | N               | 0.02        | 0.044    |

N:  $P > 0.05$
